# Supplementary material for: Melanoma-Secreted Lysosomes Trigger Monocyte-Derived Dendritic Cell Apoptosis and Limit Cancer Immunotherapy
Source: Oxford University Press journal article supplement (doi:10.1158/0008-5472.can-19-2944), 2020-03-03
Supplement: 00085472can192944-sup-229314_2_supp_6084975_q5jf87.pdf [file 00085472can192944-sup-229314_2_supp_6084975_q5jf87.pdf]

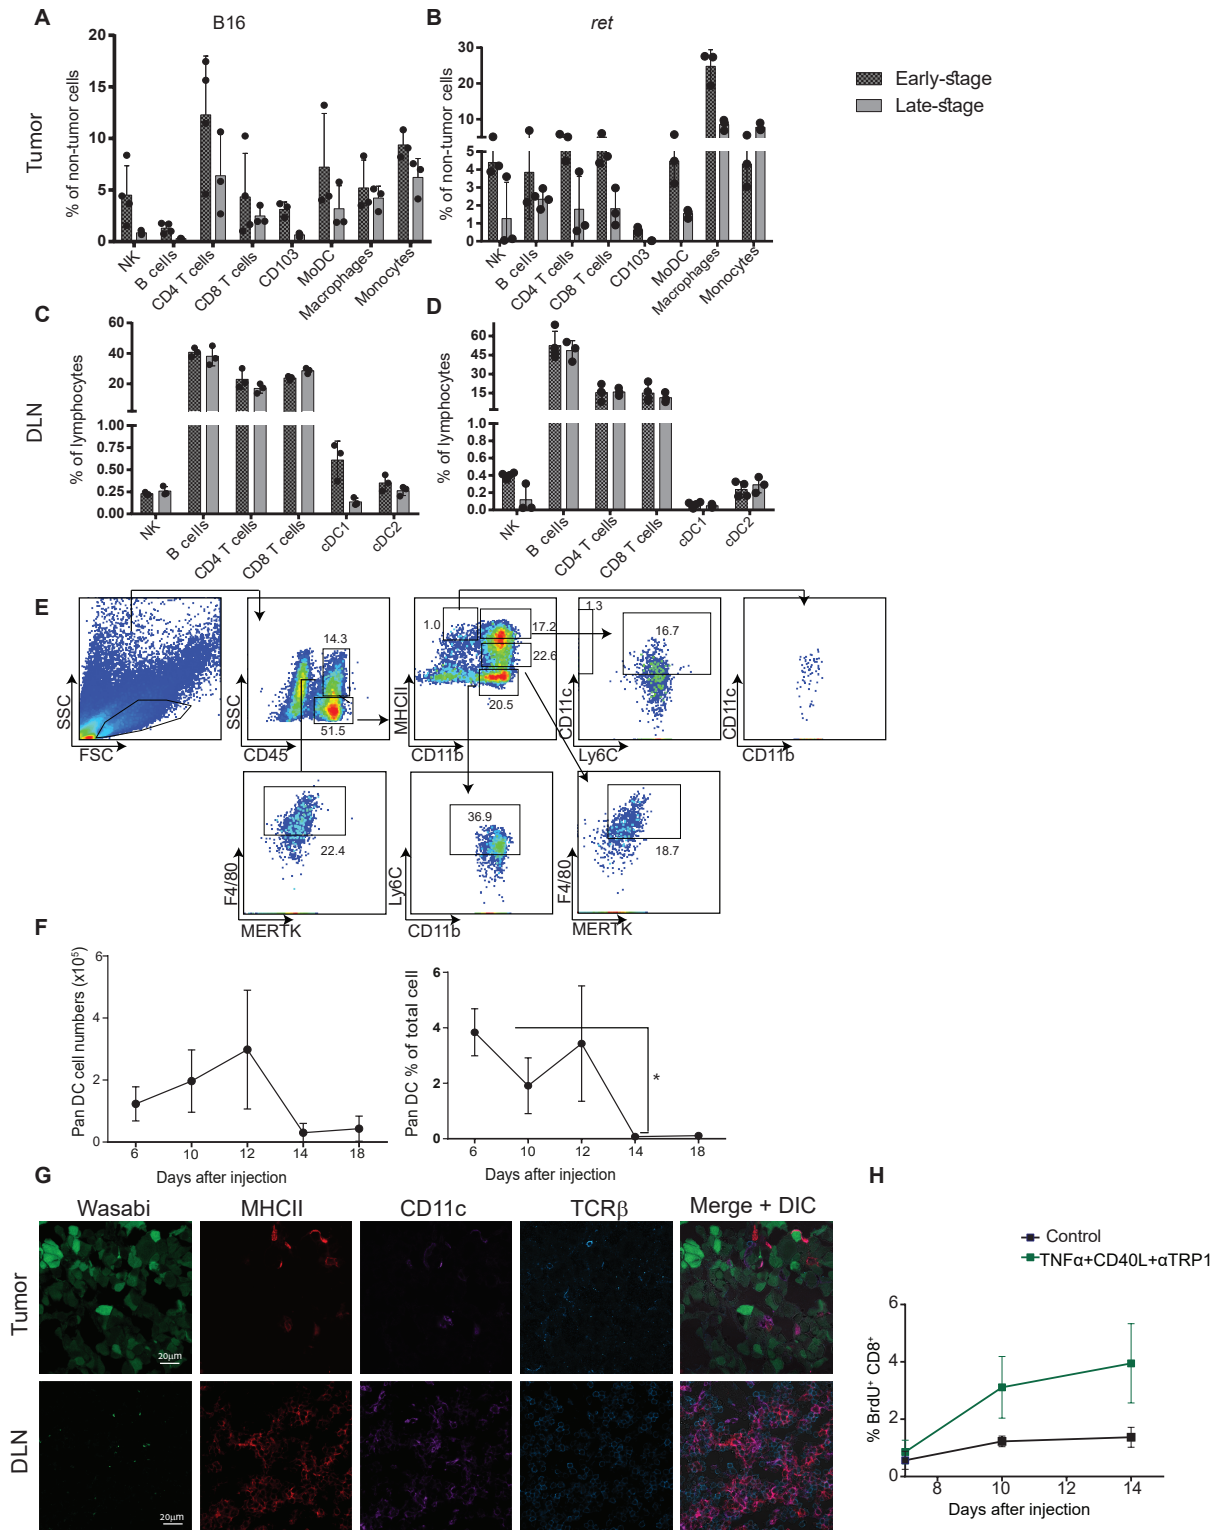

**Supplemental Figure 2-** Cell numbers of multiple immune cell subsets, and mainly dendritic cells, are decreased over time in melanoma tumors. **(A)** Mean percentages of immune cell subsets that infiltrate B16F10 tumors on early (day 6) and late (day 14) stage. **(B)** Mean percentages of immune cell subsets that infiltrate *ret* tumors on early (day 6) and late (day 14) stage. **(C)** Mean percentages of immune cell subsets in the DLN of B16F10 tumor-bearing mice from early (day 6) and late (day 14) stage. **(D)** Mean percentages of immune cell subsets in the DLN of *ret* tumor-bearing mice from early (day 6) and late (day 14) stage. **(E)** Gating strategy of tumor infiltrating myeloid cells flow cytometry analysis. **(F)** Mean numbers (left graph) and percentages (right graph) of tumor-infiltrating pan DC. **(G)** Histological sections of wasabi-labeled B16F10 tumors from early-stage (day 8). **(H)** Mean percentages of BrdU incorporation in CD8<sup>+</sup> in the DLN of B16F10 tumor-bearing mice.
